# Supplementary material
Source: PubMed Central journal article supplement (PMC2670121)
Supplement: M900070200_1.pdf [file M900070200_1.pdf]

## LEGENDS TO SUPPLEMENTARY FIGURES

Fig. S1. Amplification of cDNAs by the primers designed on the basis of the EST information. The cDNA fragments for *CURS* (A) and *DCS* (B) were amplified.

Fig. S2. Multiple alignment of the amino acid sequences of plant type III PKSs. The red box indicates the three amino acids forming the Cys-His-Asn catalytic triad that is essential for starter substrate loading and malonyl-CoA condensation. *DCS*, diketide-CoA synthase; *CURS*, curcumin synthase; *MsCHS*, a chalcone synthase from *Medicago sativa* (DNA

accession no. AAA02824); RhBAS, a benzalacetone synthase from *Rheum palmatum* (AAK82824); WtPKS1, a polyketide synthase from *Wachendorfia thyrsiflora* (AAY727928).

**Fig. S3.** Expression of *DCS* (A) and *CURS* (B) in turmeric. The relative expression was quantified by qPCR and normalized to 18S rRNA.

**Fig. S4.** SDS-PAGE of purified *DCS* and *CURS* by Ni-NTA column. Lane 1, marker; lane 2, purified *DCS* and *CURS*.

**Fig. S5.** Analysis of the compound derived by hydrolysis of feruloyl-diketide-CoA and *trans*-5-(4-hydroxy-3-methoxyphenyl)-3-oxopent-4-enoic acid methyl ester. The alkaline hydrolysis of feruloyl-diketide-CoA [**3b**] (A) and *trans*-5-(4-hydroxy-3-methoxyphenyl)-3-oxopent-4-enoic acid methyl ester (B) resulted in the formation of the same compound, *trans*-5-(4-hydroxy-3-methoxyphenyl)-3-oxopent-4-enoic acid [**3c**]. *Trans*-5-(4-Hydroxy-3-methoxyphenyl)-3-oxopent-4-enoic acid [**3c**] is readily decarboxylated to yield dehydrozingerone [**3d**]. A methyl ester synthesized from *trans*-5-(4-hydroxy-3-methoxyphenyl)-3-oxopent-4-enoic acid, as a reference, was hydrolyzed by 1 M KOH just before LC-ESIMS analysis. The UV (C), MS (E), and MS/MS (G) spectra of the compound derived by hydrolysis of feruloyl-diketide-CoA are shown, together with the UV (D), MS (F), and MS/MS (H) spectra, of the hydrolysis product of the control methyl ester.

**Fig. S6.** HPLC analysis of the products after co-incubation of *DCS* and *CURS* in the presence of feruloyl-CoA [**3a**], *p*-coumaroyl-CoA [**2a**], and malonyl-CoA (A) and a similar HPLC analysis of an ethyl acetate extract of the rhizome of turmeric (B). Curcumin [**3e**], demethoxycurcumin [**4e**], and bisdemethoxycurcumin [**2e**] were detected in both analyses, although the abundance ratios of curcumin [**3e**] to demethoxycurcumin [**4e**] and bisdemethoxycurcumin [**2e**] were different.

Supplementary Table 1. Primers used for quantitative real time PCR

| Gene                  | Primer sequence (5' to 3')   |
|-----------------------|------------------------------|
| <i>DCS</i> (forward)  | CAACAGCACGCCCCAGTCGA         |
| <i>DCS</i> (reverse)  | GTGCTGTTCATCCTGGACGAG        |
| <i>CURS</i> (forward) | TCAGCTCATCCATCACGAAGTACAC    |
| <i>CURS</i> (reverse) | CATCATTGACGCCATCGAAGC        |
| 18S rRNA (forward)    | CCTTCCTCTAAATGATAAGGTTCAATGG |
| 18S rRNA (reverse)    | GATTGAATGGTCCGGTGAAGTGTT     |

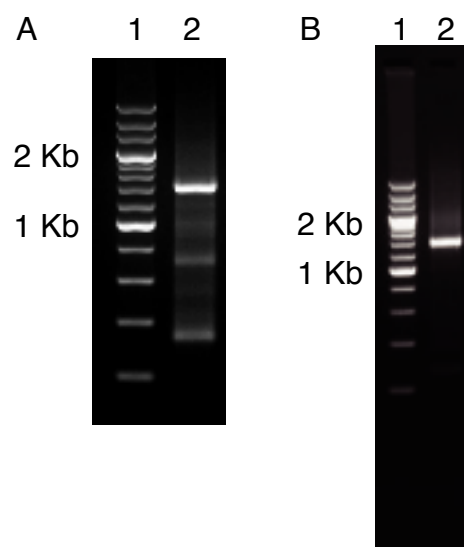

Fig. S1. Katsuyama et al.

|        |     |                                              |                                  |
|--------|-----|----------------------------------------------|----------------------------------|
| DCS    | 1   | -----MEANGYRITHS--ADGPATILAI GTANPTNVVDQ     | NAYPDFYFRVTNSEY                  |
| CURS   | 1   | -----MANLHALRREQR--AQGPATIMAIGTATPPNLYEQ     | STFPDFYFRVTNSDD                  |
| MsCHS  | 1   | -----MVSVSEIRKAQR--AEGPATILAI GTANPANCVEQ    | STYPDFYFKITNSEH                  |
| RhBAS  | 1   | -----MATEEMKK-----LATVMAIGTANPPNCYQ          | ADFPDFYFRVTNSDH                  |
| OsCUS  | 1   | MAPTTTMSGALYPLGEMRRSQR--ADGLAAVLAIGTANPPNCVT | QEEIPDFYFRVTNSDH                 |
| WtPKS1 | 1   | -----MASTEGIQAYRNNMAE                        | GPATIMAIGTANPPNVVDA              |
|        |     |                                              | STFPDVFYWRVTNSEH                 |
|        |     |                                              |                                  |
| DCS    | 48  | LQ-ELKAKFRRICEKAAIRKRRLYLTEEILRENPS          | LLAPMAPSFDARQAI VVEAVPKLAK       |
| CURS   | 49  | KQ-ELK KFRRMCEKTMVKRYLHLTEEILKERPK           | LCSYKEASFDRODIVVEEIPRLAK         |
| MsCHS  | 49  | KT-ELKEKFQRMCDKSMIKRRMYLTEEILKENPN           | VCEYMAPSLDARQDMVVVEVPRLGK        |
| RhBAS  | 42  | LI-NLKQKFKRLCENSRIEKRYLHVTEEILKENPN          | IAAYEATSLNVRHKMQVKGVVAVELGK      |
| OsCUS  | 59  | LT-ALKDKFKRICQEMGVQRRYLHHTTEMLSAHP           | EFVDRDAPSLDARLDIAADAVPELAA       |
| WtPKS1 | 51  | LSPEYRVKLRICERSSIRKRRLVLTEEQLLKENPT          | LTTTVVDASYDERQSI VLDVAVPKLAC     |
|        |     |                                              |                                  |
| DCS    | 107 | EAAEKAIKEWGRP KSDITHLVFCSASGIDMPGSD          | LQLLKLLGLPPSVNRVMLYNVGC          |
| CURS   | 108 | EAAEKAIKEWGRP KSEITHLVFCSISGIDMPGADY         | RLATLLGLPLTVNRLMIYSQACHMG        |
| MsCHS  | 108 | EAAVKAIKEWGP KSKITHLIVCTTSGVDMPGADY          | QLTKLLGLRPYVKRYMMYQQGCFAG        |
| RhBAS  | 101 | EAAEKAIKEWGP KSKITHLIVCCLAGVDMPGADY          | QLTKLLDLDP SVKRFFMYHLGCYAG       |
| OsCUS  | 118 | EAAKKAIAEWGRPAADITHLVVTTNSGAHVPGVD           | FRLVPLGLRPSVRRRTMLHLNCGCFAG      |
| WtPKS1 | 111 | EAAAKAIKEWGRP KTDITHMVVCTGAGVDVPGVD          | YKMMNLLGLPPTVNRVMLYNVGC          |
|        |     |                                              | CHAS                             |
|        |     |                                              |                                  |
| DCS    | 167 | GTALRVAKDLAENNRGARVLAVCSEVTVLSYRGP           | HPAHIESLFVQALFGDGAAALVVGSD       |
| CURS   | 168 | AAMLRIAKDLAENNRGARVLVVACEITVLSFRGP           | NEGDFEALAGQAGFGDGAGAVVVGAD       |
| MsCHS  | 168 | GTVLR LAKDLAENNKGARVLVVCSEVTAVTFRG           | PSDTHLDSL VGQALFGDGAAALVVGSD     |
| RhBAS  | 161 | GTVLR LAKDLAENNKGARVLIVCSEMTTTCFRG           | PSETHLDSMIGQAILGDGAAAVIVGAD      |
| OsCUS  | 178 | CAALRLAKDLAENSRGARVLVVAAELTLMYFTGP           | DEGCFRTLLVQGLFGDGAAAVIVGAD       |
| WtPKS1 | 171 | GTVLR LAKDLAENNKGARVLVVSSEVSVMFFRGP          | AEGDVEILLGQALFGDGSAAILVVGAD      |
|        |     |                                              |                                  |
| DCS    | 227 | PVDGVERPIFEIASASQVMLPESAEAVGGHLREI           | GLTFHLKSQLPSIIASNIEQSLTTAC       |
| CURS   | 228 | PLEGIEKPIYEIAAAMQETVAESQGAVGGHLRAF           | GWTFYFLNQLPAIIADNLGRSLERAL       |
| MsCHS  | 228 | PVPEIEKPIFEMVWTAQTIAPDSEGAIDGHLRE            | AGLTFHLKLDVPGI VSKNITKALVEAF     |
| RhBAS  | 221 | PDLTVERPIFELVSTAQTIVPESHGAIEGHLLES           | GLSFHLYKTVP TLISNNIKTCLSDAF      |
| OsCUS  | 238 | -ADDVERPLFEIVSAAQTIIPESDHALNMRFTERR          | LDGVLGRQVPG LIGDNVERCLLDMF       |
| WtPKS1 | 231 | PIEGVEKPIEQIFSASQMTLPEGEHLVA                 | GHLRELGLTFHLKQPQLENTVSSNIHKPLKKA |
|        |     |                                              |                                  |
| DCS    | 287 | SPLGLSD----WNQLFWAVHPGGRAILDQVEAR            | LGLEKDRLAATR HVLSEYGNMQSATVL     |
| CURS   | 288 | APLGVRE----WNDVFWVAHPGNWAIIDDAIEAK           | LQLSPDKLSTARHVFTEYGNMQSATVY      |
| MsCHS  | 288 | EPLGISD----YNSIFWIAHPGGPAILDQVEOKL           | ALKPEKMNATREVLSEYGNMSSACVL       |
| RhBAS  | 281 | TPLNISD----WNSLFWIAHPGGPAILDQVTAKV           | GLEKEKLVTRQVLKDYGNMSSATVF        |
| OsCUS  | 297 | GPLLGGDGGGWNDLFWAVHPGSSTIMDQVDAAL            | GLEPGKLAASRRVLSDYGNMSSGATVI      |
| WtPKS1 | 291 | EPLNITD----WNSIFWIVHPGGRAILDQVQEKI           | GLEENKLDVSRVLAENGNMSSASVF        |
|        |     |                                              |                                  |
| DCS    | 343 | FILDEMNRNSAAEGHATTGEGLDWGVLLGFGPGL           | SIETVVLHSCRLN-                   |
| CURS   | 344 | FVMDELRRKRS AVEGRSTTGDLQWGVLLGFGPGL          | SIETVVLRSMP L--                  |
| MsCHS  | 344 | FILDEMRRKKS TQNGLKTTGEGLEWGVLFGFGPGL         | TIETVVLRSVAI--                   |
| RhBAS  | 337 | FIMDEMRRKKS LENOQATTGEGLEWGVLFGFGPGL         | ITVETVVLRSVPEVIS                 |
| OsCUS  | 357 | FALDELRRQRKE--AAAAGEWPELGVMMAFGPGMT          | VDAMLLHATSHVN                    |
| WtPKS1 | 347 | FIMDEMRRKRSAAQGCSTTGEGHEWGVLFGFGPGL          | SIETVVLHSPVLSI                   |

Fig. S2. Katsuyama et al.

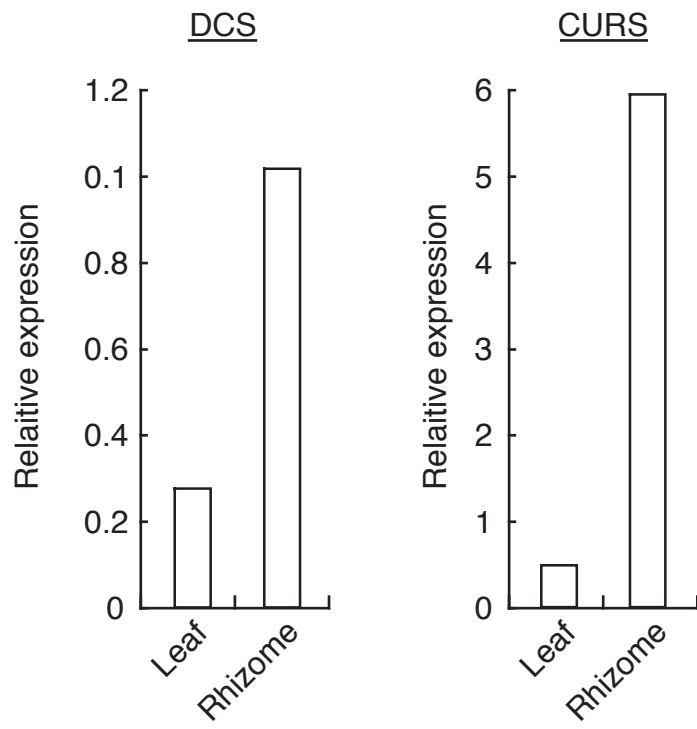

Fig. S3. Katsuyama et al.

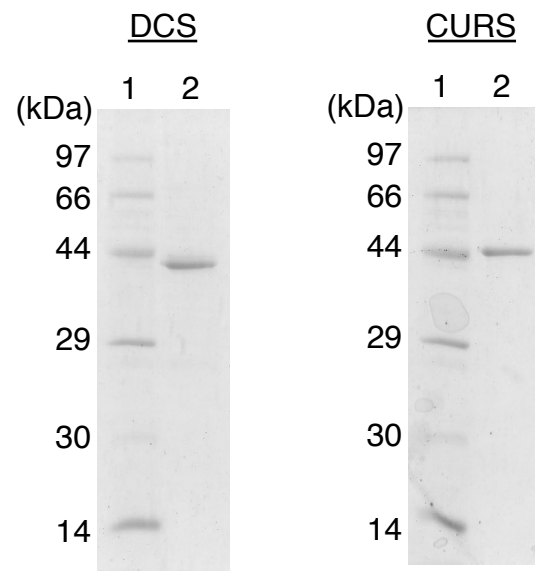

Fig. S4 Katsuyama et al.

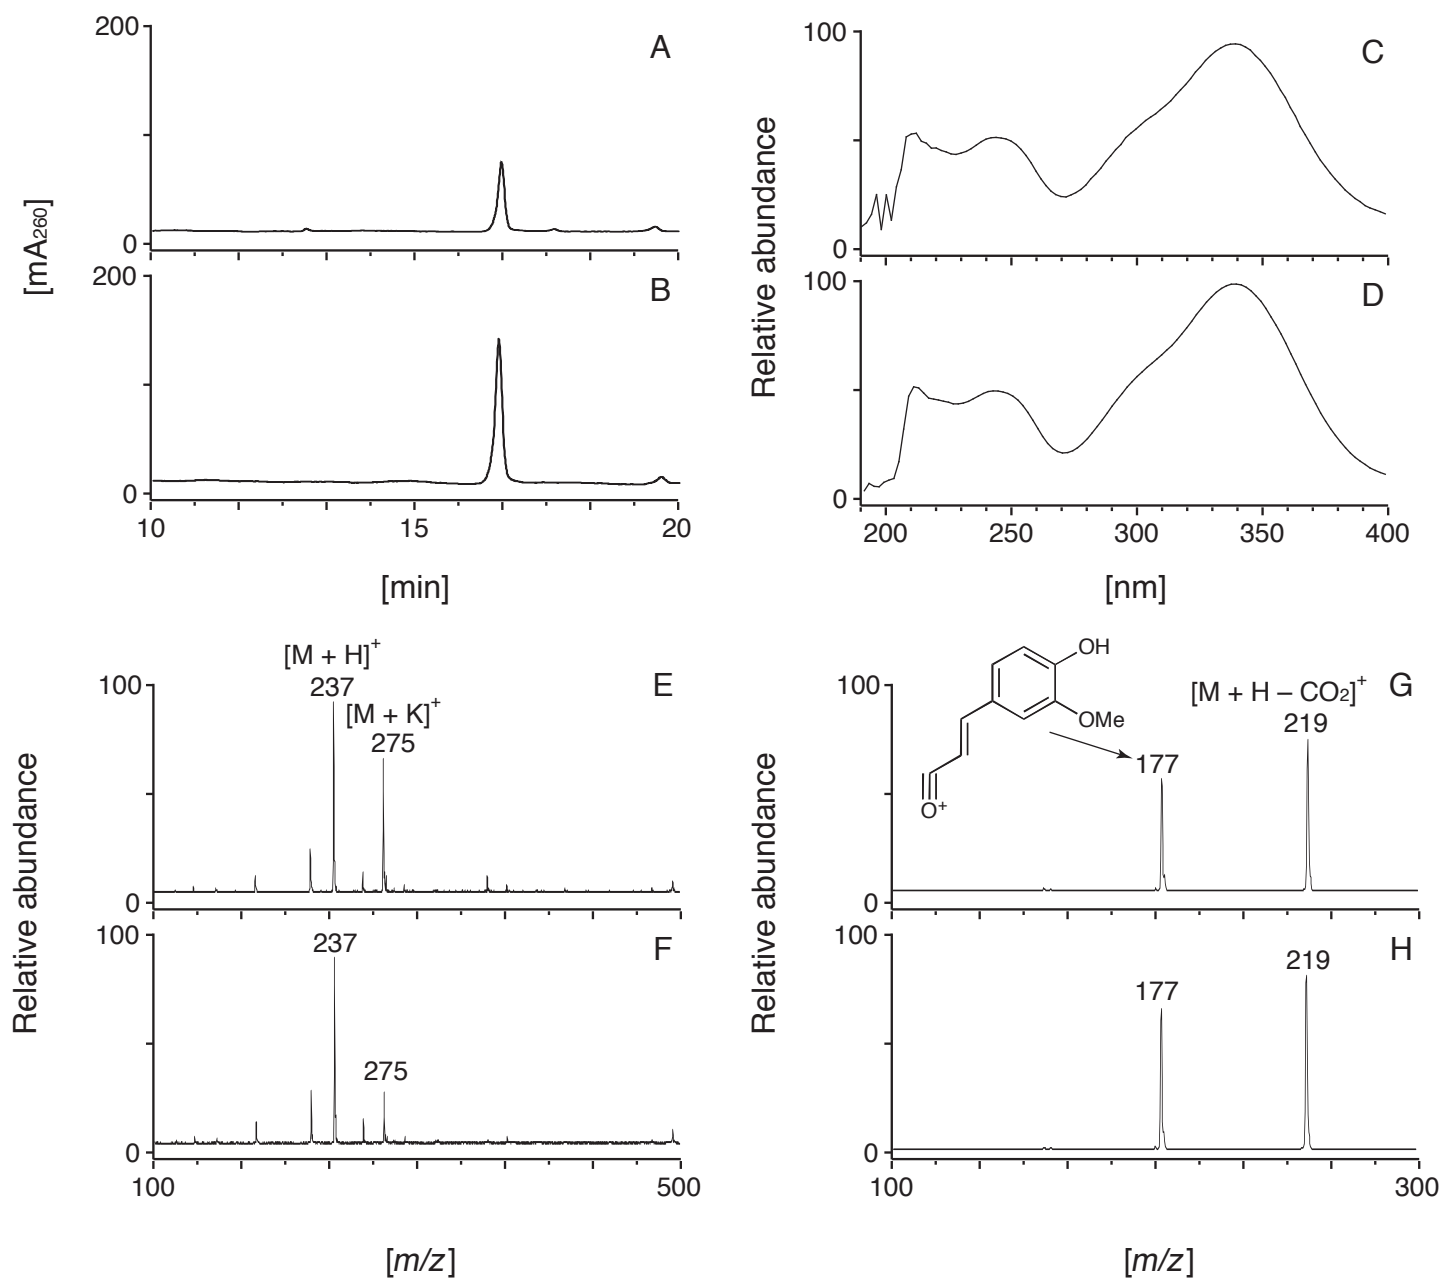

Fig. S5. Katsuyama et al.

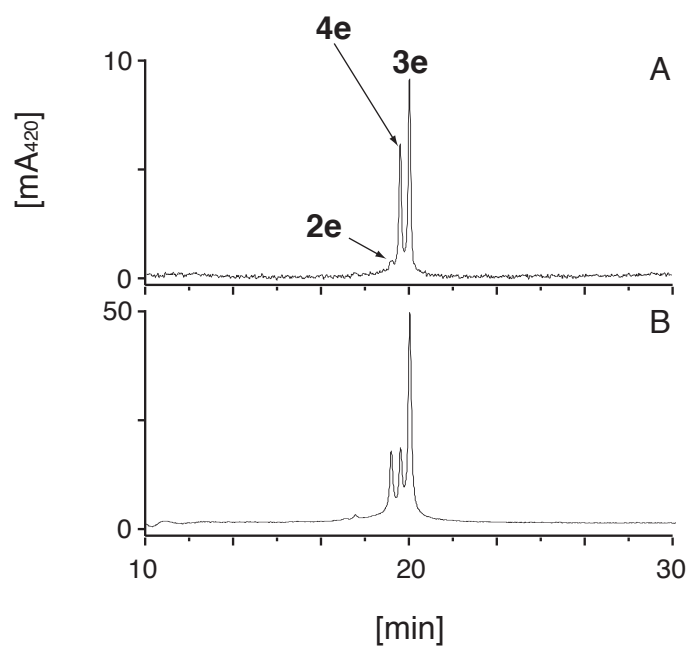

Fig. S6. Katsuyama et al.
